# Supplementary material
Source: ML conference proceedings conference paper supplement (https://openaccess.thecvf.com/content/ICCV2025/html/Fan_Momentum-GS_Momentum_Gaussian_ICCV_2025_paper.html)
Supplement: Supplementary file 1 [file Fan_Momentum-GS_Momentum_Gaussian_ICCV_2025_supplemental.pdf]

# Momentum-GS: Momentum Gaussian Self-Distillation for High-Quality Large Scene Reconstruction

## Supplementary Material

### 1. More Details

**Scene partition.** (1) Criteria: The scene is first equally divided along the x-axis and then along the z-axis, with each block having the same area. Corresponding views are selected based on visibility. (2) Initialization: Each block is initialized from the same point cloud generated by COLMAP, but only the assigned part and overlapping boundary are reconstructed. (3) Views selection: Views at the boundaries are selected based on visibility, and each block reconstructs an extended region to ensure better reconstruction quality at the boundary area.

**Motivation of momentum updates.** The momentum-based update provides stable, global guidance, allowing each block’s Gaussian decoder to effectively leverage the broader scene context, thereby significantly enhancing reconstruction consistency. As demonstrated in Table 3, using a momentum value of 0.9 outperforms a setting without momentum updates.

### 2. More Ablation Study

**Effectiveness of self-distillation.** As shown in Table 1, we performed additional experiments to validate the effectiveness of our self-distillation approach: (1) As shown in setting (b), extending parallel training to 8 blocks with 8 GPUs improved the reconstruction quality. (2) Alternating training across blocks every 500 iterations, using 4 GPUs to train 8 blocks in parallel (setting (c)), slightly decreased the reconstruction quality compared with setting (b). (3) Incorporating our momentum-based self-distillation into setting (c) enhanced the reconstruction quality (setting (d)), clearly demonstrating the effectiveness of our proposed method.

| Training strategy                      | #Block | #GPU | PSNR $\uparrow$ | SSIM $\uparrow$ | LPIPS $\downarrow$ |
|----------------------------------------|--------|------|-----------------|-----------------|--------------------|
| (a) w/ Parallel training               | 4      | 4    | 23.10           | 0.790           | 0.221              |
| (b) w/ Parallel training               | 8      | 8    | 23.34           | 0.800           | 0.210              |
| (c) w/ Parallel training (alternating) | 8      | 4    | 23.17           | 0.797           | 0.211              |
| (d) w/ momentum self-distill.          | 8      | 4    | 23.56           | 0.806           | 0.205              |
| (e) Full                               | 8      | 4    | <b>23.65</b>    | <b>0.813</b>    | <b>0.194</b>       |

Table 1. Ablation study on different training strategies.

**The weight of consistency loss.** An ablation study is performed to evaluate the impact of the consistency loss weight  $\lambda_{consistency}$ . As reported in Table 2, the results indicate that model performance remains stable across a wide range of  $\lambda_{consistency}$  values.

**Momentum value.** We ablated momentum value  $m$  and

| Scene | Building        |                 |                    | Rubble          |                 |                    |
|-------|-----------------|-----------------|--------------------|-----------------|-----------------|--------------------|
|       | PSNR $\uparrow$ | SSIM $\uparrow$ | LPIPS $\downarrow$ | PSNR $\uparrow$ | SSIM $\uparrow$ | LPIPS $\downarrow$ |
| 1     | 23.53           | 0.808           | 0.201              | 26.51           | 0.816           | 0.210              |
| 10    | 23.63           | 0.810           | 0.200              | 26.62           | 0.821           | 0.204              |
| 50    | <b>23.65</b>    | <b>0.813</b>    | <b>0.194</b>       | 26.66           | 0.826           | 0.200              |
| 100   | 23.63           | 0.810           | 0.197              | <b>26.69</b>    | <b>0.829</b>    | <b>0.198</b>       |

Table 2. Ablation study on  $\lambda_{consistency}$ .

| Momentum values | PSNR $\uparrow$ | SSIM $\uparrow$ | LPIPS $\downarrow$ |
|-----------------|-----------------|-----------------|--------------------|
| 0.0             | 23.44           | 0.806           | 0.203              |
| 0.5             | 23.59           | 0.808           | 0.201              |
| 0.7             | 23.62           | 0.810           | 0.198              |
| 0.9 (default)   | 23.65           | 0.813           | 0.194              |
| 0.95            | 23.50           | 0.806           | 0.201              |
| 0.99            | 22.06           | 0.741           | 0.254              |

Table 3. Comparison between different momentum values.

Table 3 shows that our model is robust to variations. The reconstruction quality show minimal differences, with the best performance achieved at  $m=0.9$  (our default setting).

### 3. Quantitative Evaluation

**VRAM.** We report the peak VRAM usage during inference across five large-scale scenes, as shown in Table 4. Despite achieving superior reconstruction quality, our method requires less VRAM compared to the purely 3DGS-based approach. The VRAM usage, measured in MB, highlights the efficiency of our method. Notably, as scene complexity increases (*e.g.*, in MatrixCity), the advantages of our method become even more pronounced.

| Scene              | Building    | Rubble      | Residence   | Sci-Art     | MatrixCity  |
|--------------------|-------------|-------------|-------------|-------------|-------------|
| CityGaussian       | 8977        | 5527        | 6494        | <b>2726</b> | 14677       |
| Momentum-GS (Ours) | <b>5830</b> | <b>4106</b> | <b>6419</b> | 6647        | <b>4616</b> |

Table 4. Peak VRAM usage (in MB) during inference.

**Storage.** We report the storage usage across five large-scale scenes, as shown in Table 5. Leveraging our hybrid representation, our method significantly reduces the number of parameters required for storage compared to purely 3DGS-based methods. This reduction is especially notable in larger and more complex scenes, such as MatrixCity, where the storage savings are most substantial. Notably, as scene complexity increases (*e.g.*, in MatrixCity), the advantages

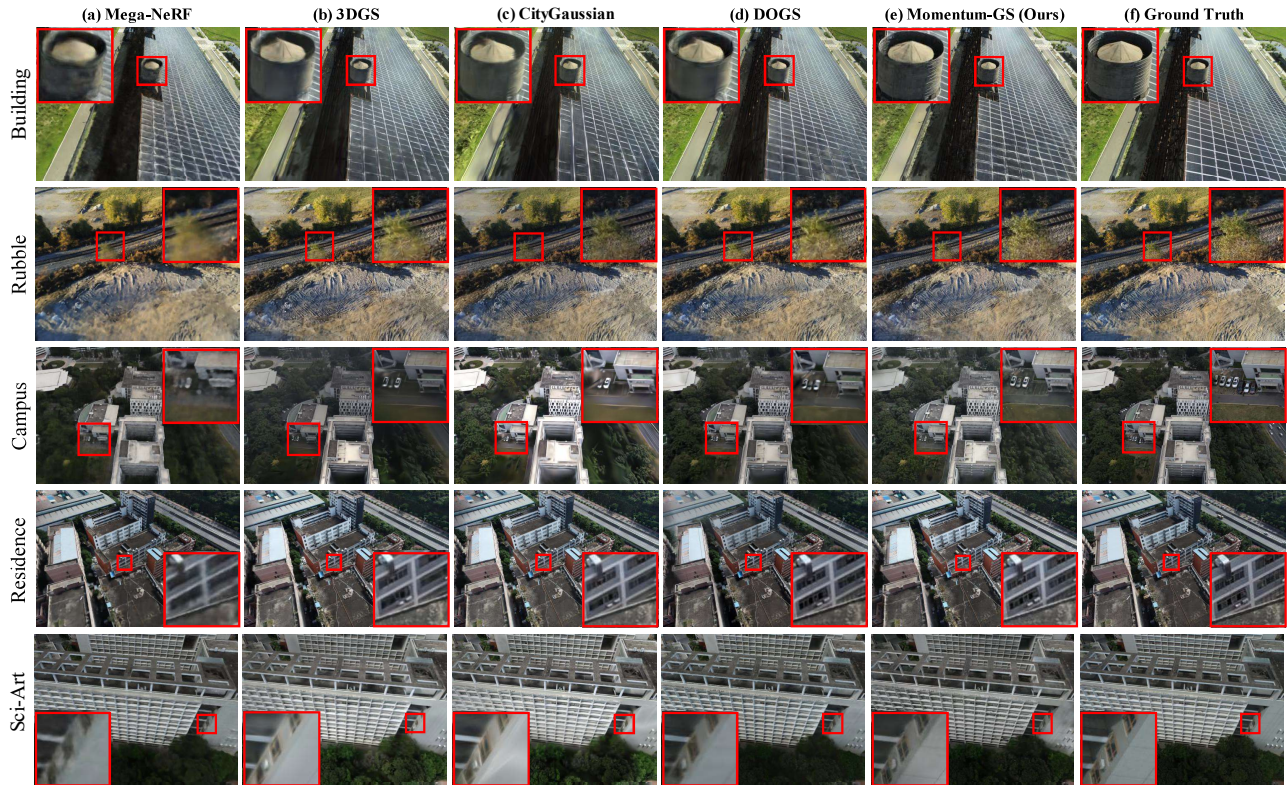

Figure 1. Qualitative comparisons of our Momentum-GS and prior methods across four large-scale scenes.

of our method become even more pronounced, demonstrating its effectiveness in handling challenging scenarios. For clarity and consistency, storage usage is reported in GB.

| Scene              | Building             | Rubble               | Residence            | Sci-Art     | MatrixCity           |
|--------------------|----------------------|----------------------|----------------------|-------------|----------------------|
| CityGaussian       | 3.07                 | 2.22                 | 2.49                 | <b>0.88</b> | 5.40                 |
| Momentum-GS (Ours) | <b>2.45</b> (20.2%↓) | <b>1.50</b> (32.7%↓) | <b>2.00</b> (19.7%↓) | 0.97        | <b>2.08</b> (61.5%↓) |

Table 5. Storage usage (in GB).

**Number of primitives.** We report the number of primitives across five large-scale scenes, as shown in Table 6.

| Scene      | Building | Rubble | Residence | Sci-Art | MatrixCity |
|------------|----------|--------|-----------|---------|------------|
| Primitives | 8.33M    | 5.09M  | 6.79M     | 3.30M   | 7.08M      |

Table 6. Primitives counts for each scene.

**Comparison of different implementations of VastGaussian.** We further compare our method with the unofficial implementation of VastGaussian in Table 7, which demonstrates improved performance over the results reported in DOGS.

| Scene                       | Building     |              |              | Rubble       |              |              |
|-----------------------------|--------------|--------------|--------------|--------------|--------------|--------------|
|                             | PSNR ↑       | SSIM ↑       | LPIPS ↓      | PSNR ↑       | SSIM ↑       | LPIPS ↓      |
| VastGaussian (DOGS version) | 21.80        | 0.728        | 0.225        | 25.20        | 0.742        | 0.264        |
| VastGaussian (Unofficial)   | 22.49        | 0.742        | 0.208        | 25.64        | 0.760        | 0.202        |
| <b>Momentum-GS (Ours)</b>   | <b>23.65</b> | <b>0.813</b> | <b>0.194</b> | <b>26.66</b> | <b>0.826</b> | <b>0.200</b> |

Table 7. Comparison of different implementations of VastGaussian.

## 4. More Visual Comparisons

We provide additional visual comparisons for the Building, Rubble, Residence, and Sci-Art scenes in Figure 1. Our method consistently reconstructs finer details across these scenes. Notably, our approach demonstrates a superior ability to reconstruct luminance, as illustrated by the Sci-Art example shown in Figure 1. While NeRF-based methods are capable of capturing luminance by leveraging neural networks to learn global features such as lighting, they tend to produce blurrier results compared to 3DGS-based methods. This underscores the effectiveness of our hybrid representation, which combines the strengths of both NeRF-based and 3DGS-based approaches.
